# Supplementary material for: Unravelling binder chemistry in sodium/potassium ion batteries for superior electrochemical performances
Source: Royal Society of Chemistry journal article supplement (doi:10.1039/d1ta09516a), 2022-01-01
Supplement: d1ta09516a1.pdf [file d1ta09516a1.pdf]

## Supporting Information

### Unravelling Binder Chemistry in Sodium/Potassium Ion Batteries for Superior Electrochemical Performances

Chunting Wang,<sup>a</sup> Long Su,<sup>a</sup> Nana Wang,<sup>b</sup> Dan Lv,<sup>a</sup> Dongdong Wang,<sup>a</sup> Jian  
Yang,<sup>\*a</sup> and Yitai Qian<sup>ac</sup>

a. C. Wang, L. Su, D. Lv, D. Wang, Prof. J. Yang, Prof. Y. Qian  
Key Laboratory of Colloid and Interface Chemistry, Ministry of Education, School of  
Chemistry and Chemical Engineering  
Shandong University  
Jinan 250100, P. R. China  
E-mail: [yangjian@sdu.edu.cn](mailto:yangjian@sdu.edu.cn)

b. Institute for Superconducting and Electronic Materials University of Wollongong  
Innovation Campus  
Innovation Campus, Squires Way, Wollongong  
New South Wales 2500, Australia

c. Hefei National Laboratory for Physical Science at Microscale  
Department of Chemistry  
University of Science and Technology of China  
Hefei 230026, P. R. China

**Table S1.** Initial Coulombic Efficiency (iCE) of TiO<sub>2</sub>-based anodes.

| <b>Ref.</b> | <b>iCE</b> | <b>Electrolyte</b>                     |
|-------------|------------|----------------------------------------|
| <b>1</b>    | 26.0%      | EC: DEC (1:1 by weight) with 5wt % FEC |
| <b>2</b>    | 46.0%      | EC: DEC (1:1 by weight) with 5wt % FEC |
| <b>3</b>    | 44.5%      | EC: DMC (1:1 by volume) with 2 % FEC   |
| <b>4</b>    | 58.2%      | EC: DMC (1:1 by volume)                |
| <b>5</b>    | 58.8%      | EC: DMC (1:1 by volume) with 5wt % FEC |
| <b>6</b>    | 76.0%      | Diglyme                                |
| <b>7</b>    | 45.2%      | Diglyme with 5% FEC                    |
| <b>8</b>    | 80.0%      | DME                                    |
| <b>9</b>    | 54.3%      | Diglyme                                |
| <b>10</b>   | 68.6%      | Diglyme                                |
| <b>11</b>   | 76.0%      | Diglyme                                |

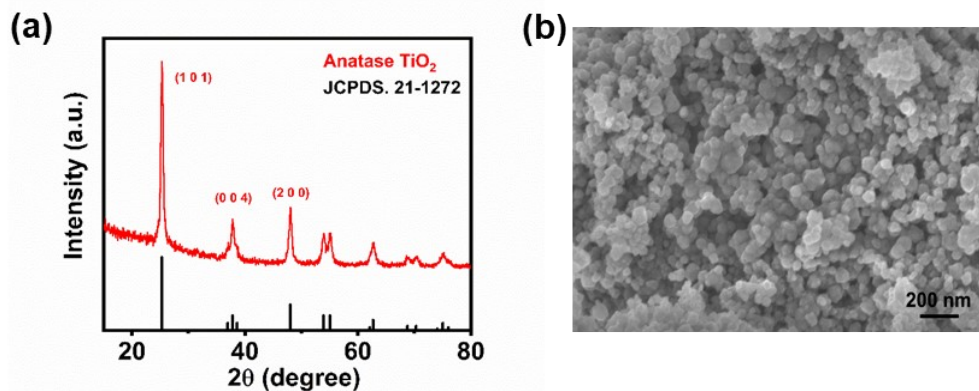

**Fig. S1** (a) XRD pattern and (b) SEM image of commercial  $\text{TiO}_2$  nanoparticles.

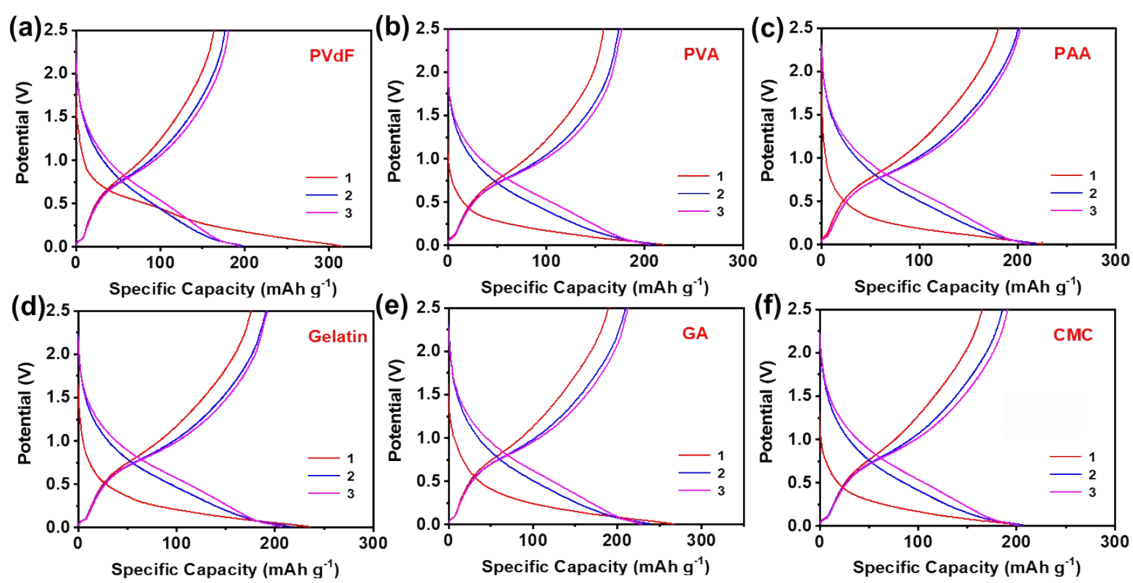

**Fig. S2** Discharge/charge voltage profiles of the electrodes using different binders. (a) PVdF, (b) PVA, (c) PAA, (d) Gelatin, (e) GA, and (f) CMC.

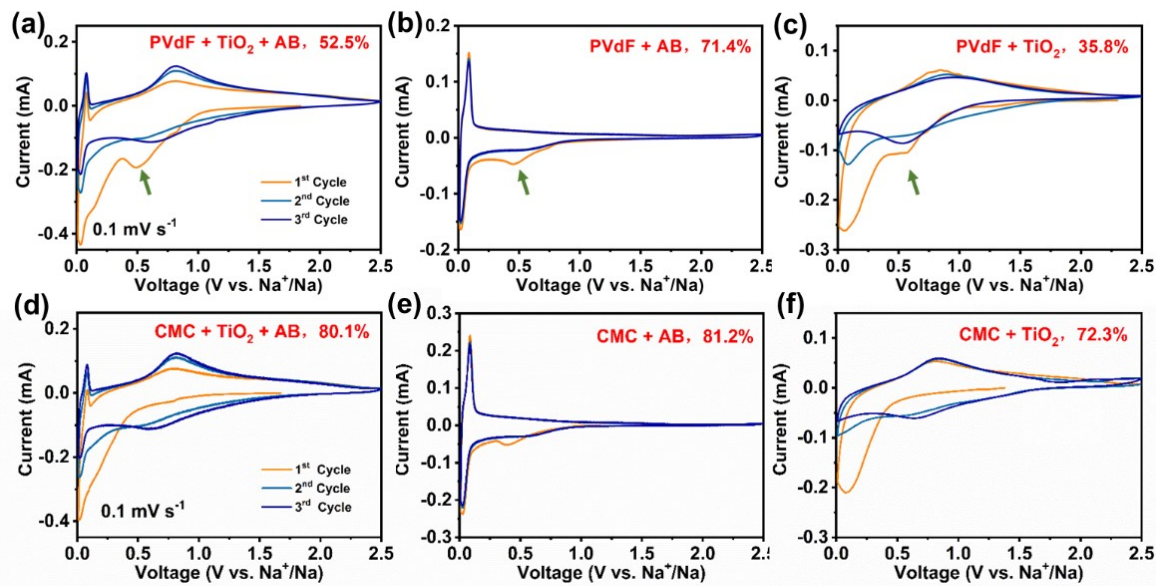

**Fig. S3** CV curves of the electrodes using different recipes. (a) PVdF+AB+TiO<sub>2</sub>, (b) PVdF+AB, (c) PVdF+TiO<sub>2</sub>, (d) CMC+ AB+TiO<sub>2</sub>, (e) CMC+AB, and (f) CMC+TiO<sub>2</sub>.

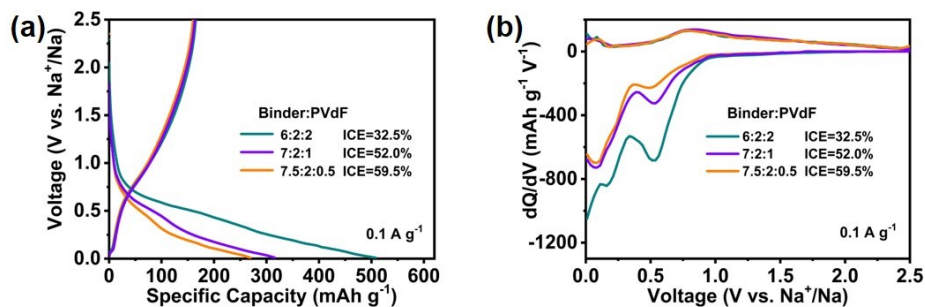

**Fig. S4** (a) Discharge/charge voltage profiles and (b)  $dQ/dV$  curves of the electrodes using different contents of PVdF in the electrode. Here, 7:2:1 indicates that the electrode contains 70 wt% TiO<sub>2</sub>, 20 wt% AB and 10 wt% PVdF.

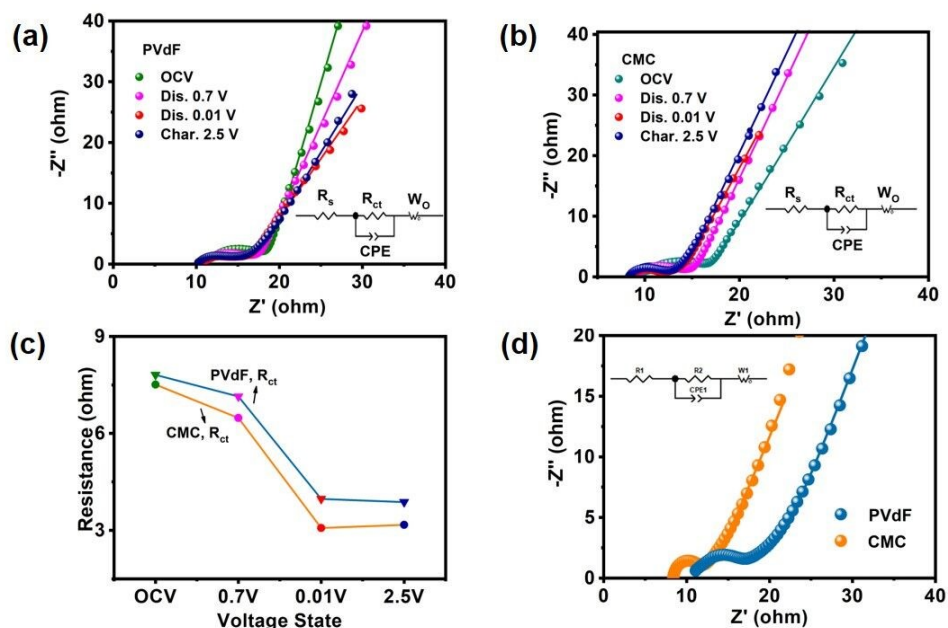

**Fig. S5** (a) EIS spectra of the electrodes at different states of discharge in the first cycle. (b) EIS spectra of the electrodes at different states of charge in the first cycle. (c) Comparison of  $R_{ct}$  for the electrodes using different binders. (d) EIS spectra of the electrodes using different binders after 10 cycles.

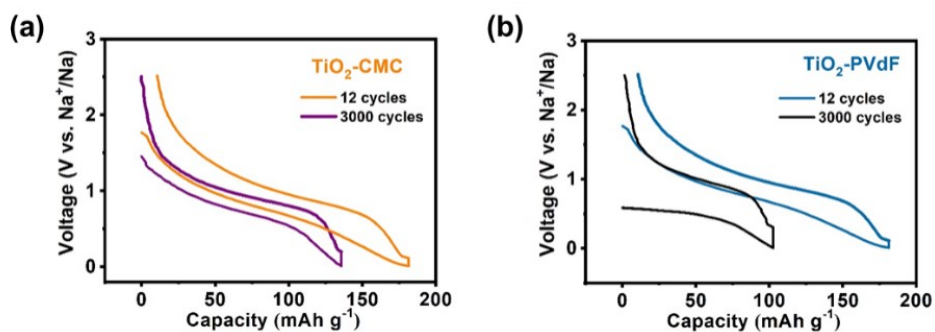

**Fig. S6** Charge and discharge profiles of the electrodes with (a) CMC or (b) PVdF as the binder after 12 cycles and 3000 cycles.

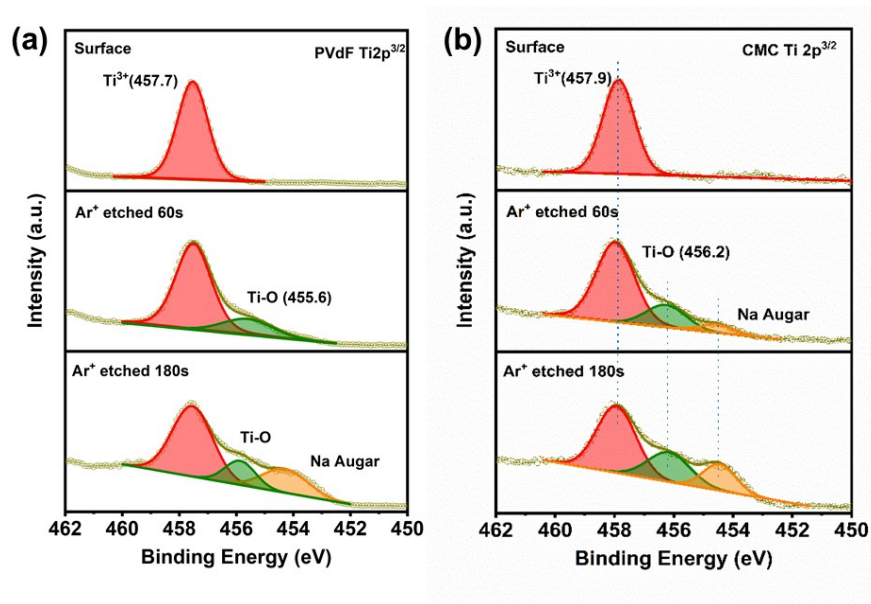

**Fig. S7** High-resolution  $Ti\ 2p^{3/2}$  spectra of the electrodes using (a) PVdF or (b) CMC as binder after the first discharge to 0.01 V.

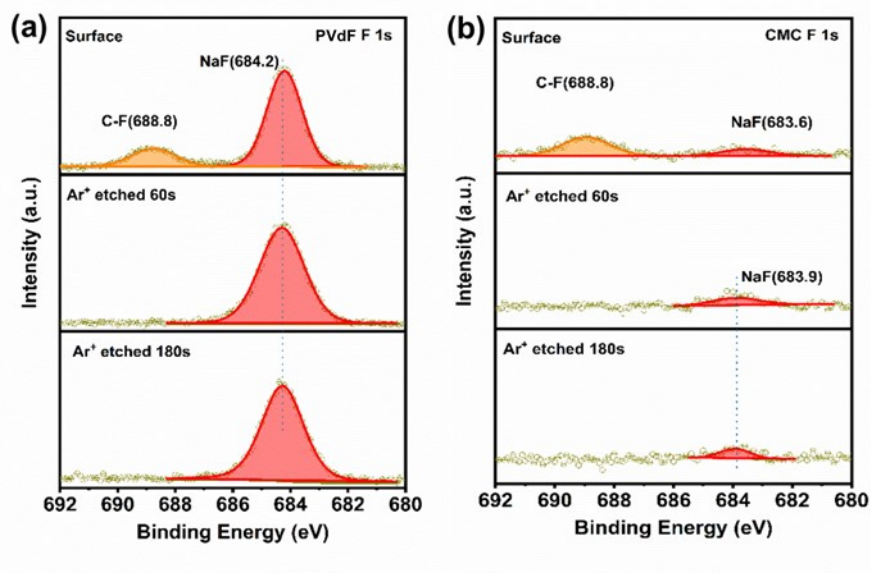

**Fig. S8** High-resolution  $F\ 1s$  spectra of the electrodes using (a) PVdF or (b) CMC as binder after the first discharge to 0.01 V.

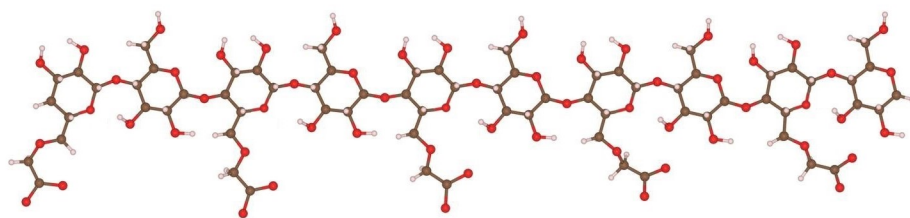

Fig. S9 Structure diagram of CMC used for DFT calculation.

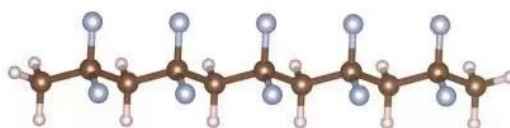

Fig. S10 Structure diagram of PVdF used for DFT calculation.

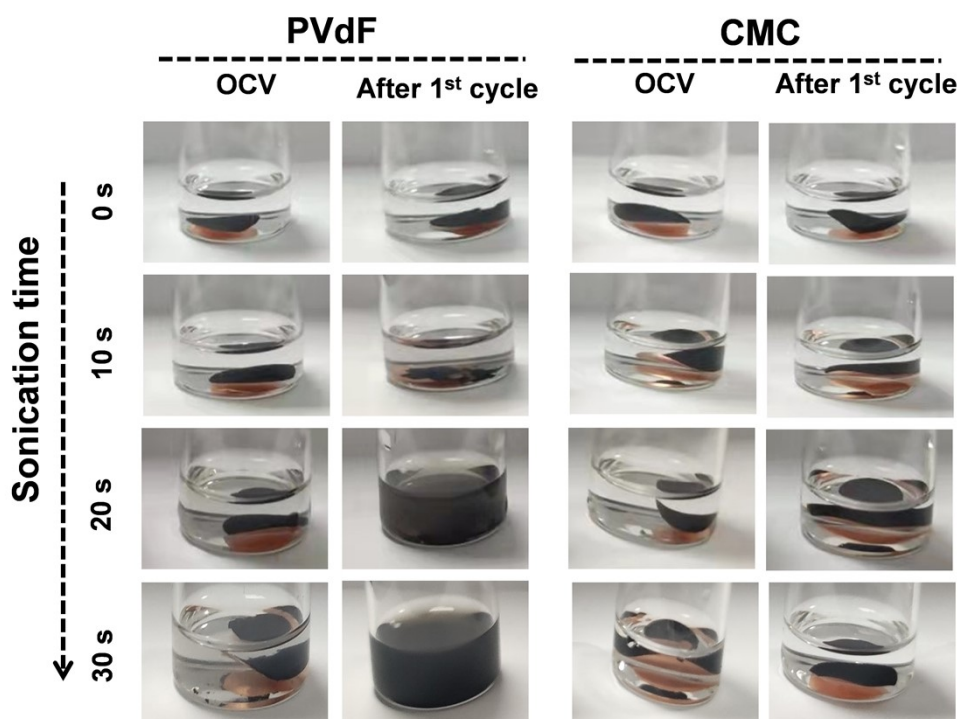

Fig. S11 Real images of the electrodes using different binders after ultrasonication.



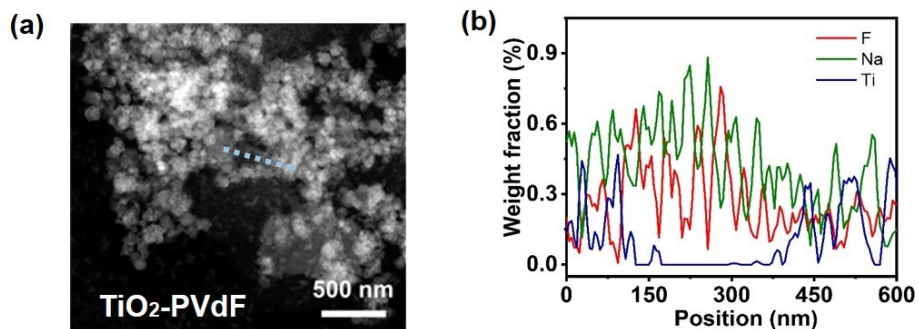

**Fig. S12** (a) HAADF-STEM image, and the (b) line scanning profiles of Ti, Na, F along the dash line in the electrode after the first cycle using PVdF as binder.

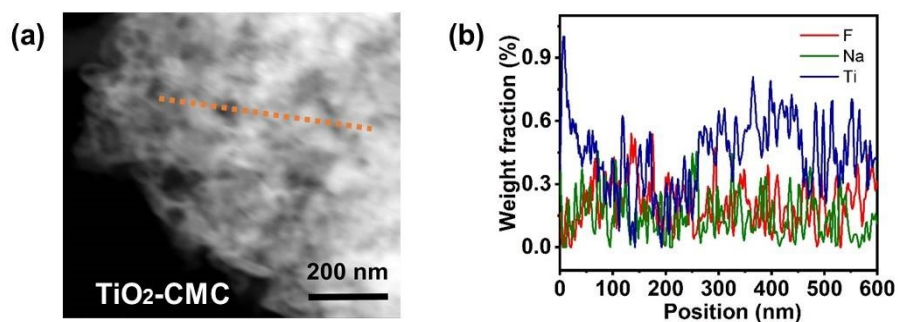

**Fig. S13** (a) HAADF-STEM image, and the (b) line scanning profiles of Ti, Na, F along the dash line in the electrode after the first cycle using CMC as binder.

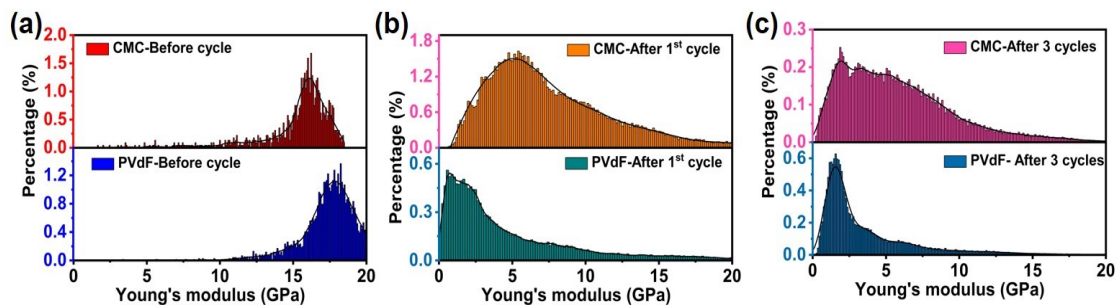

**Fig. S14** Young's modulus distribution of the electrodes using CMC or PVdF as the binder. (a) Before cycle, (b) after the first cycle, (c) after 3 cycles.



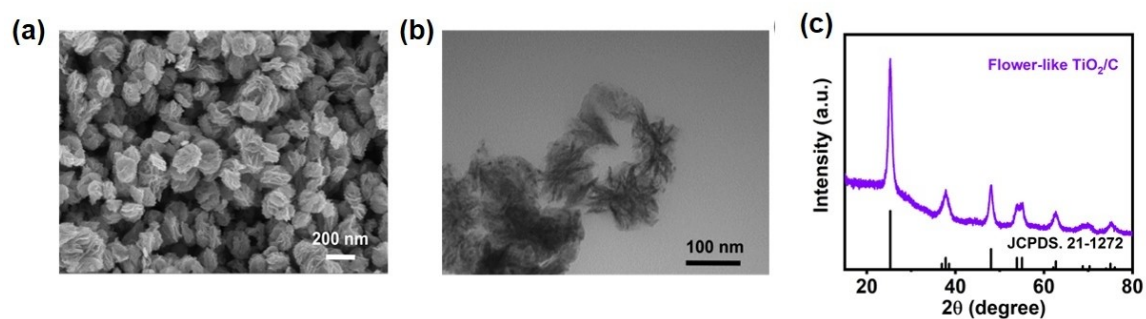

**Fig. S15** (a) SEM image, (b) TEM image and (c) XRD pattern of flower-like  $\text{TiO}_2/\text{C}$ .

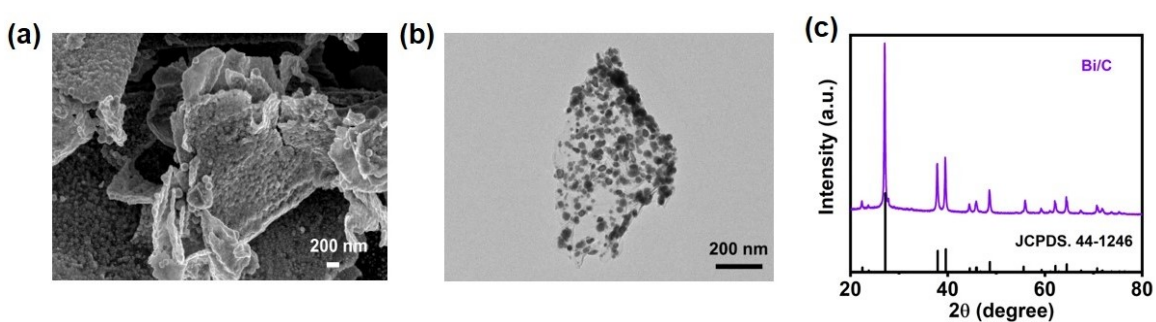

**Fig. S16** (a) SEM image, (b) TEM image and (c) XRD pattern of Bi/C nanoparticles.

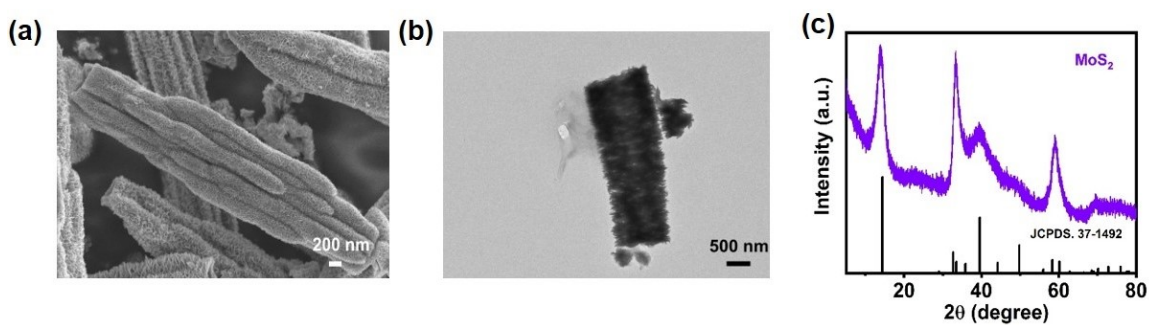

**Fig. S17** (a) SEM image, (b) TEM image and (c) XRD pattern of  $\text{MoS}_2$  nanoparticles.

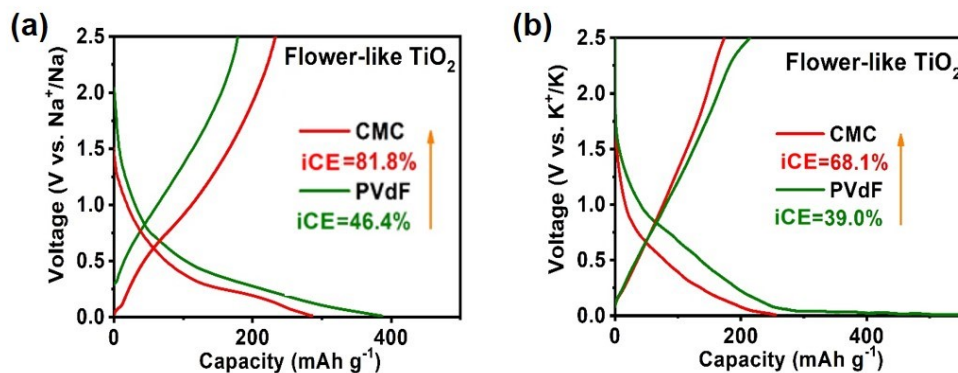

**Fig. S18** Advantages of CMC over PVdF as the binder using flower-like TiO<sub>2</sub>/C as the anode materials in SIBs.

## References

- 1 L. Huang, L. Zeng, J. Zhu, L. Sun, L. Yao, L. Deng, P. Zhang, *J. Power Sources*, 2021, **493**, 229678.
- 2 Y. Tian, J. Julio Gutiérrez Moreno, Z. Lu, L. Li, M. Hu, D. Liu, Z. Jian, X. Cai, *Chem. Eng. J.*, 2021, **407**, 127198.
- 3 R. Luo, Y. Ma, W. Qu, J. Qian, L. Li, F. Wu, R. Chen, *ACS Appl. Mater. Interfaces*, 2020, **12**, 23939-23950.
- 4 L. Fu, Q. Wang, H. He, Y. Tang, H. Wang, H. Xie, *J. Power Sources*, 2021, **489**, 229516.
- 5 J. Ma, M. Xing, L. Yin, K. San Hui, K. N. Hui, *Appl. Surf. Sci.*, 2021, **536**, 147735.
- 6 M. Ni, D. Sun, X. Zhu, Q. Xia, Y. Zhao, L. Xue, J. Wu, C. Qiu, Q. Guo, Z. Shi, X. Liu, G. Wang, H. Xia, *Small*, 2020, **16**, 2006366.
- 7 M. Fan, Z. Lin, P. Zhang, X. Ma, K. Wu, M. Liu, X. Xiong, *Adv. Energy Mater.*, 2021, **11**, 2003037.
- 8 B. Zhao, Q. Liu, Y. Chen, Q. Liu, Q. Yu, H. B. Wu, *Adv. Funct. Mater.*, 2020, **30**, 2002019.
- 9 Z. Liu, W. Zhang, Z. Zhou, X. Liu, H. Zhang, M. Wei, *ACS Appl. Energy Mater.*, 2020, **3**, 3619-3627.
- 10 K. Li, J. Zhang, D. Lin, D. W. Wang, B. Li, W. Lv, S. Sun, Y. B. He, F. Kang, Q. H. Yang, L. Zhou, T. Y. Zhang, *Nat. Commun.*, 2019, **10**, 725.

11 K. Lan, L. Liu, J. Zhang, R. Wang, L. Zu, Z. Lv, Q. Wei, D. Zhao, *J. Am. Chem. Soc.*, 2021, **143**, 14097.
